## Defining the mechanisms underlying cyclin dependent kinase control of HIF-1 $\alpha$

Noel A. Warfel<sup>1,2</sup>

<sup>1</sup>University of Arizona Cancer Center, Tucson, AZ, USA

<sup>2</sup>Department of Cellular and Molecular Medicine, University of Arizona, Tucson, AZ, USA

**Correspondence to:** Noel A. Warfel, **email:** warfelna@arizona.edu

**Commentary on:** Zhao and El-Deiry. Identification of Smurf2 as a HIF-1 $\alpha$  degrading E3 ubiquitin ligase. *Oncotarget*. 2021; 12:1970–79. <https://doi.org/10.18632/oncotarget.28081>. [PubMed]

**Keywords:** hypoxia; HIF-1; cyclin dependent kinase; SMURF2

**Received:** October 26, 2021

**Accepted:** February 15, 2022

**Published:** March 03, 2022

**Copyright:** © 2022 Warfel. This is an open access article distributed under the terms of the [Creative Commons Attribution License](#) (CC BY 3.0), which permits unrestricted use, distribution, and reproduction in any medium, provided the original author and source are credited.

Constitutive activation of HIF-1 $\alpha$  is common in human cancers, regardless of oxygen tension. While the majority of HIF-1 activation can be attributed to lack of oxygen in the tumor microenvironment, numerous non-hypoxic stimuli have also been shown to regulate HIF-1 $\alpha$  levels. Stabilization of HIF-1 $\alpha$  in normoxia has been attributed to genetic alterations, most notably loss of the von Hippel-Lindau (VHL) tumor suppressor gene, the primary E3 ligase responsible for targeting HIF-1 $\alpha$  for proteasomal degradation [1]. In recent years, multiple new proteins and post-translational modifications have been implicated in the oxygen-independent control of HIF-1 $\alpha$ . This includes alternative E3-ubiquitin ligases that target HIF-1 $\alpha$  for proteasomal degradation (RACK, CHIP, HAF, etc.) [2], as well as binding proteins that enhance stability, such as HSP90 [3]. Another critical event that impacts HIF-1 $\alpha$  levels and activation is phosphorylation. Numerous phosphorylation sites and upstream kinases, including PKA and PIM1 kinases, have been identified and shown to modulate HIF-1 $\alpha$  protein stability in both normoxia and hypoxia [4–6]. Regardless of the mechanism, stabilization of HIF-1 $\alpha$  in normoxia results in the constitutive upregulation of genes that initiate and sustain signaling pathways that drive cellular processes that support tumor growth and metastasis. As a result, identifying new mechanisms regulating HIF-1 is crucial to our understanding of cancer progression and developing more effective therapies.

Prior research from the El-Deiry lab was the first to demonstrate that the cyclin dependent kinases CDK1 and CDK4/6 are sufficient to stabilize HIF-1 $\alpha$ , independent of hypoxia or VHL. Following up on these exciting findings, Zhou and El-Deiry utilized an unbiased proteomic screen to identify SMAD specific E3-ubiquitin protein ligase 2 (SMURF2) as a novel E3 ligase controlling HIF-1 $\alpha$  levels downstream of CDK4/6, regardless of oxygen tension. Moreover, mass spectrometry analysis revealed loss of

phosphorylation of HIF-1 $\alpha$  at Ser451 in cells treated with palbociclib, raising the possibility that this site could be important for maintaining HIF-1 stability. Interestingly, recent work from our group showed that phosphorylation of HIF-1 $\alpha$  at Thr455 by PIM1 blocks HIF-1 $\alpha$  degradation by disrupting prolyl hydroxylase domain (PHD) protein binding and hydroxylation, which is the initiating step in the canonical HIF-1 $\alpha$  degradation pathway [4]. While the mechanism appears to be distinct, since PIM1 blocks VHL-mediated degradation, the close proximity of these sites and their localization within the oxygen dependent degradation domain in HIF-1 $\alpha$  points to the importance of post-translational modifications to this region for the regulation of HIF-1 $\alpha$  protein stability through both canonical and non-canonical means. Importantly, analysis of the TCGA data showed that high levels of SMURF2 correlated with significantly better overall survival and disease-free survival in clear cell renal cancer, in which over 80% of patients lack functional VHL and display high basal levels of HIF-1 $\alpha$ . In a parallel study, the same authors leveraged their findings to test whether targeting multiple molecules that stabilize HIF-1 $\alpha$  simultaneously enhanced therapeutic response. Strikingly, the combination of FDA-approved CDK4/6 inhibitors and HSP90 inhibitors showed enhanced inhibition of HIF-1 activity and synergistic anti-tumor effects in models of renal and colon cancer lacking VHL and Rb [7]. Taken together, these studies describe a new mechanism responsible for the activation of HIF-1 in human cancer and provide a strong rationale for the use of CDK4/6 inhibitors to target HIF-1, particularly in tumors lacking VHL or harboring other signaling alterations that promote the constitutive activation of HIF-1.

### REFERENCES

1. Maxwell PH, Wiesener MS, Chang GW, Clifford SC, Vaux EC, Cockman ME, Wykoff CC, Pugh CW, Maher ER,

- Ratcliffe PJ. The tumour suppressor protein VHL targets hypoxia-inducible factors for oxygen-dependent proteolysis. *Nature*. 1999; 399:271–75. <https://doi.org/10.1038/20459>. [PubMed]
2. Yee Koh M, Spivak-Kroizman TR, Powis G. HIF-1 regulation: not so easy come, easy go. *Trends Biochem Sci*. 2008; 33:526–34. <https://doi.org/10.1016/j.tibs.2008.08.002>. [PubMed]
  3. Isaacs JS, Jung YJ, Mimnaugh EG, Martinez A, Cuttitta F, Neckers LM. Hsp90 regulates a von Hippel Lindau-independent hypoxia-inducible factor-1 alpha-degradative pathway. *J Biol Chem*. 2002; 277:29936–44. <https://doi.org/10.1074/jbc.M204733200>. [PubMed]
  4. Casillas AL, Chauhan SS, Toth RK, Sainz AG, Clements AN, Jensen CC, Langlais PR, Miranti CK, Cress AE, Warfel NA. Direct phosphorylation and stabilization of HIF-1 $\alpha$  by PIM1 kinase drives angiogenesis in solid tumors. *Oncogene*. 2021; 40:5142–52. <https://doi.org/10.1038/s41388-021-01915-1>. [PubMed]
  5. Casillas AL, Toth RK, Sainz AG, Singh N, Desai AA, Kraft AS, Warfel NA. Hypoxia-Inducible PIM Kinase Expression Promotes Resistance to Antiangiogenic Agents. *Clin Cancer Res*. 2018; 24:169–80. <https://doi.org/10.1158/1078-0432.CCR-17-1318>. [PubMed]
  6. Bullen JW, Tchernyshyov I, Holewinski RJ, DeVine L, Wu F, Venkatraman V, Kass DL, Cole RN, Van Eyk J, Semenza GL. Protein kinase A-dependent phosphorylation stimulates the transcriptional activity of hypoxia-inducible factor 1. *Sci Signal*. 2016; 9:ra56. <https://doi.org/10.1126/scisignal.aaf0583>. [PubMed]
  7. Zhao S, Zhou L, Dicker DT, Lev A, Zhang S, Ross E, El-Deiry WS. Anti-cancer efficacy including Rb-deficient tumors and VHL-independent HIF1 $\alpha$  proteasomal destabilization by dual targeting of CDK1 or CDK4/6 and HSP90. *Sci Rep*. 2021; 11:20871. <https://doi.org/10.1038/s41598-021-00150-8>. [PubMed]
